# Supplementary material
Source: PubMed Central journal article supplement (PMC7647925)
Supplement: mmc2.pdf [file mmc2.pdf]

# Activation of NF- $\kappa$ B-Inducing Kinase in Islet $\beta$ Cells Causes $\beta$ Cell Failure and Diabetes

Xinzhi Li,<sup>1</sup> Yongsen Wu,<sup>1</sup> Yue Song,<sup>1</sup> Na Ding,<sup>1</sup> Min Lu,<sup>1</sup> Linna Jia,<sup>4</sup> Yujun Zhao,<sup>2</sup> Ming Liu,<sup>3</sup> and Zheng Chen<sup>1</sup>

<sup>1</sup>HIT Center for Life Sciences, School of Life Science and Technology, Harbin Institute of Technology, Harbin 150001, China; <sup>2</sup>State Key Laboratory of Drug Research, Shanghai Institute of Materia Medica, Chinese Academy of Sciences, Shanghai 201203, China; <sup>3</sup>Department of Endocrinology and Metabolism, Tianjin Medical University General Hospital, Tianjin 300052, China; <sup>4</sup>Key Laboratory of Molecular Epigenetics of the Ministry of Education (MOE), School of Life Sciences, Northeast Normal University, Changchun 130024, China

**Islet  $\beta$  cell death has been proved to contribute to diabetes. Studies suggest that the activation of nuclear factor  $\kappa$ B (NF- $\kappa$ B)-inducing kinase (NIK) is involved in the  $\beta$  cell dysfunction encountered in obesity. However, the pathological significance of NIK activation in diabetes remains largely unknown. Here, we report that  $\beta$  cell-specific overexpression of NIK ( $\beta$ -NIK-OE) results in spontaneous diabetes in male mice at a young age ( $\geq 10$  weeks of age), which is likely due to insulin deficiency,  $\beta$  cell death, and insulinitis. Importantly, inhibiting the kinase activation of NIK by the small molecule B022 prevents NIK- or  $H_2O_2$ -induced  $\beta$  cell death and also reduces streptozotocin (STZ)-induced  $\beta$  cell death while ameliorating hyperglycemia, suggesting that the kinase activity of NIK is essential in inducing islet inflammation,  $\beta$  cell death, and diabetes. In all, this study not only uncovers a role of NIK in  $\beta$  cell failure but also provides a potential therapeutic target for the treatment of diabetes.**

## INTRODUCTION

Islet  $\beta$  cell dysfunction causes both type 1 and type 2 diabetes. Inflammation plays a key role in islet  $\beta$  cell dysfunction. The canonical nuclear factor  $\kappa$ B (NF- $\kappa$ B) signaling pathway has been well studied in the regulation of islet inflammation in both type 1 and type 2 diabetes.<sup>1,2</sup> Recent studies suggest that the non-canonical NF- $\kappa$ B signaling pathway plays an important role in islet  $\beta$  cell dysfunction in obesity.<sup>3</sup> However, the role of the non-canonical NF- $\kappa$ B signaling pathway in the regulation of islet  $\beta$  cell failure in diabetes and its detailed mechanisms are not fully understood.

NF- $\kappa$ B-inducing kinase (NIK), which is also known as MAP3K14, is a key activator of the non-canonical NF- $\kappa$ B signaling pathway.<sup>4</sup> Under physiological conditions, the non-canonical NF- $\kappa$ B signaling pathway is inactivated because of the low expression of NIK. Its protein levels cannot be detected using currently available commercial antibodies, which is most likely due to TRAF2- and TRAF3-mediated ubiquitination and degradation.<sup>4</sup> Under pathological conditions, NIK mRNA levels are increased,<sup>5,6</sup> and NIK protein stability is also improved due to cytokine-mediated degradation of TRAF2 and

TRAF3. In turn, NIK/IKK $\alpha$  fully activates the non-canonical NF- $\kappa$ B signaling pathway by inducing p52 formation.<sup>4,7</sup> This p52 is the active form of NF- $\kappa$ B2,<sup>8</sup> which is translocated into the nucleus from where it induces the expression of inflammatory genes.<sup>9</sup> Recent studies have shown that the activation of NIK either by a pharmacological tool or by  $\beta$  cell-specific deletion of negative regulators (TRAF2 or TRAF3) of NIK impairs islet  $\beta$  cell function in obesity.<sup>3</sup> The genome-wide association study (GWAS) shows that a single-nucleotide polymorphism (SNP) rs17759555 of NIK (*MAP3K14*) is strongly associated with type 1 diabetes.<sup>10</sup> However, the contribution of NIK in the development of diabetes is still largely unknown.

In this study, we demonstrate that the NIK in islet  $\beta$  cells plays a key role in the development of diabetes.  $\beta$  cell-specific NIK-overexpressing ( $\beta$ -NIK-OE) mice display spontaneous diabetes at a young age ( $\geq 10$ -weeks of age), which is likely due to insulin deficiency,  $\beta$  cell death, and insulinitis. Importantly, inhibiting the kinase activation of NIK by the small molecule B022 prevents NIK- or  $H_2O_2$ -induced  $\beta$  cell death and also ameliorates streptozotocin (STZ)-induced  $\beta$  cell death and hyperglycemia, which suggests that the kinase activity of NIK is essential in inducing islet dysfunction and diabetes, and inhibition of NIK activity is a potential strategy to ameliorate  $\beta$  cell failure in diabetes.

## RESULTS

### Islet $\beta$ Cell-Specific Overexpression of NIK Causes Spontaneous Diabetes in Mice

Inflammation and oxidative stress are two major causes of both type 1 and type 2 diabetes. Tumor necrosis factor alpha (TNF- $\alpha$ ) and  $H_2O_2$  can increase the expression of NIK and its kinase activity.<sup>3,6</sup> The LT $\beta$ R/NIK/NF- $\kappa$ B2 signaling pathway is present in both islet  $\alpha$ <sup>11</sup> and  $\beta$  cells (Figures S1A–S1C). In the MIN6 cells, LT $\beta$ R was highly

Received 7 November 2019; accepted 16 July 2020;  
<https://doi.org/10.1016/j.ymthe.2020.07.016>

**Correspondence:** Zheng Chen, PhD, HIT Center for Life Sciences, School of Life Science and Technology, Harbin Institute of Technology, Harbin 150001, China.  
**E-mail:** [chenzheng@hit.edu.cn](mailto:chenzheng@hit.edu.cn)

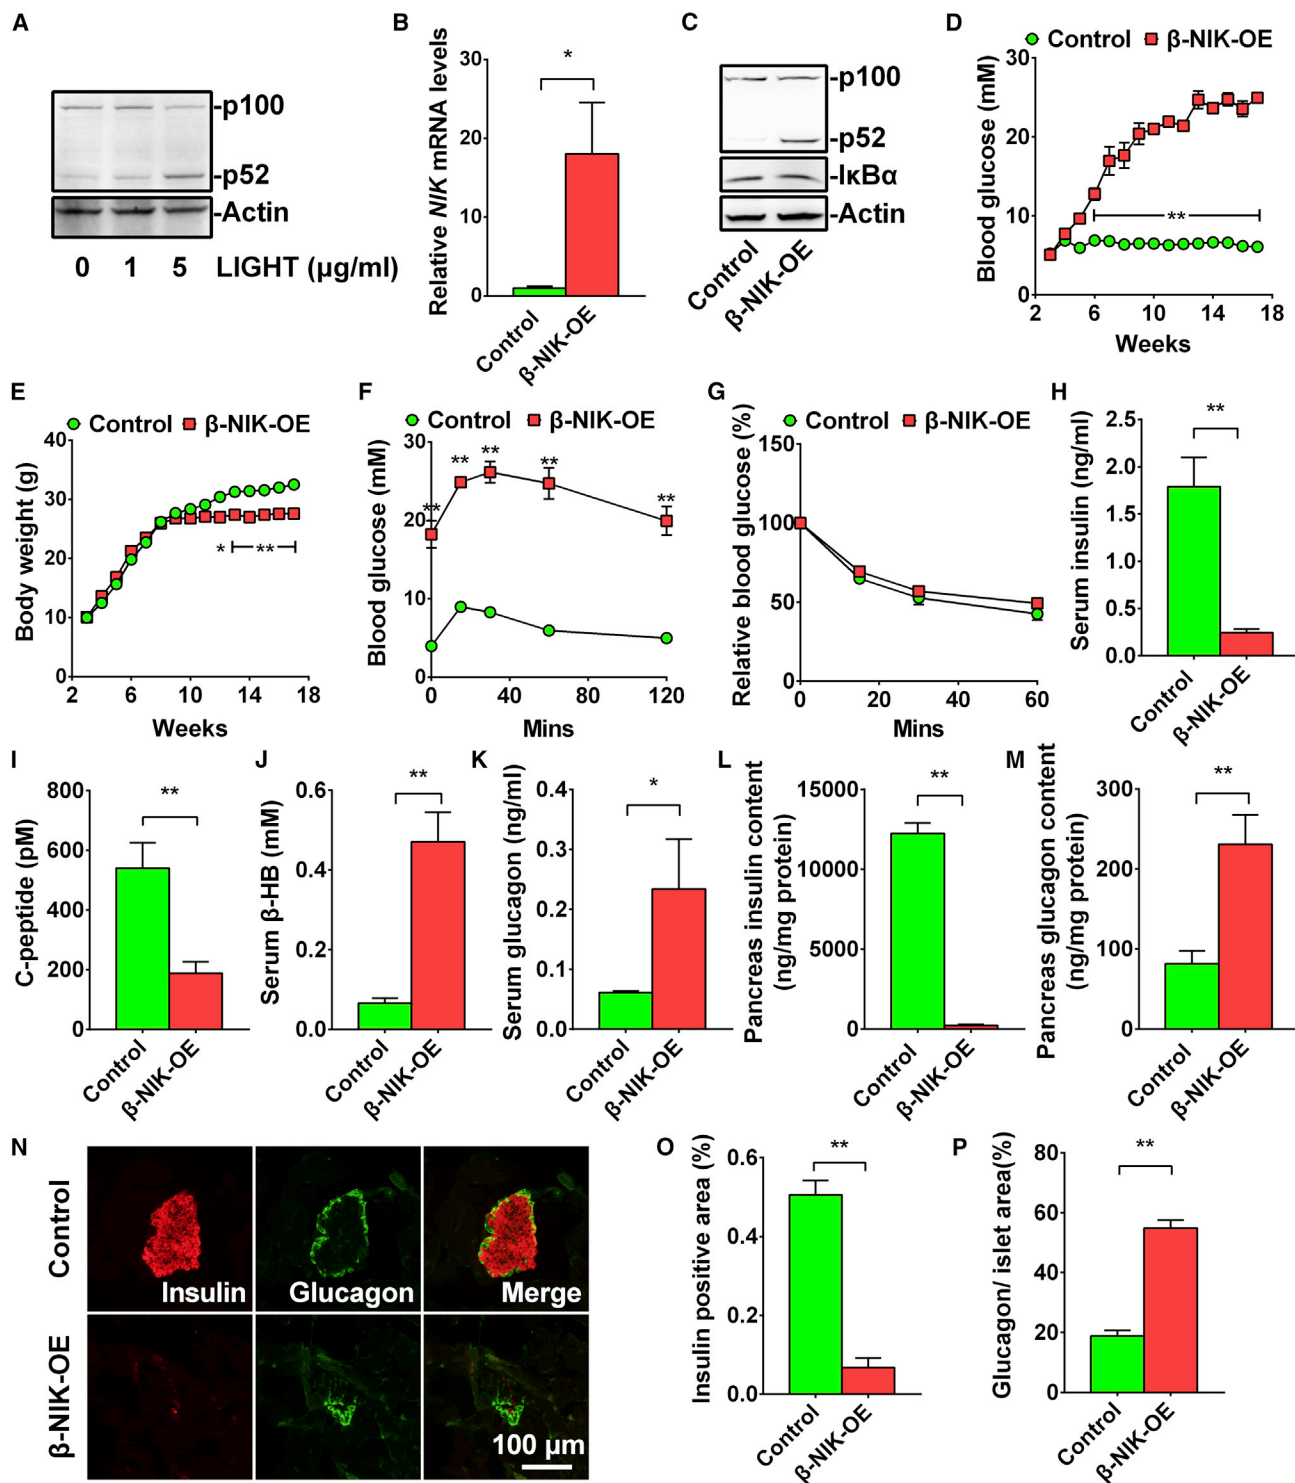

**Figure 1. Islet β-NIK-OE Induces Non-obese Diabetes**

(A) Pancreatic islets were isolated from C57BL/6 mice and treated with LIGHT at different concentrations (0, 1, and 5 μg/mL) for 2 h. NF-κB2 and Actin protein levels were measured by immunoblotting. (B and C) Pancreatic islets were isolated from male β-NIK-OE mice and control littermates at 8 weeks of age. *NIK* mRNA levels were measured by qRT-PCR and normalized to 36B4 levels (B) (β-NIK-OE: n = 4; control: n = 4). NF-κB2, IκBα, and Actin protein levels were measured by immunoblotting (C). (D) Feeding

(legend continued on next page)

expressed (Figure S1A). Immunofluorescent data also showed that LT $\beta$ R was highly expressed in insulin-positive cells (Figure S1B). Activation of LT $\beta$ R by an anti-LT $\beta$ R antibody can induce p100-to-p52 processing in a dose-dependent manner (Figure S1C). LIGHT, a ligand for LT $\beta$ R, is abnormally increased in patients with type 2 diabetes and impairs islet  $\beta$  cell function.<sup>12</sup> LIGHT activated the LT $\beta$ R/NIK/NF- $\kappa$ B2 signaling pathway and induced p52 production in a dose-dependent manner (Figure 1A). The GWAS has shown that an SNP rs17759555 of *NIK* (*MAP3K14*) is strongly associated with type 1 diabetes.<sup>10</sup> To determine whether activation of NIK in pancreatic  $\beta$  cells contributes to diabetes, we generated  $\beta$  cell-specific overexpression of NIK ( $\beta$ -NIK-OE) mice by crossing *STOP-NIK* mice with *Rip-Cre* transgenic mice. *NIK* mRNA levels were increased by more than 10-fold (Figure 1B), and the p52 production was significantly increased by  $\sim$ 17.6-fold (Figure 1C), which is within the range of LIGHT (1–5  $\mu$ g/mL)-induced p52 production (Figure 1A). The blood glucose levels in male  $\beta$ -NIK-OE mice under fed conditions were gradually increased at 3 weeks of age and reached about 20 mM at 9 weeks of age (Figure 1D). All of the male  $\beta$ -NIK-OE mice developed non-obese diabetes (NOD) at 10 weeks of age, whereas the blood glucose in control mice did not change at 3–16 weeks of age (Figure 1D). The incidence rate of diabetes was 100% in male  $\beta$ -NIK-OE mice after 10 weeks of age. The  $\beta$ -NIK-OE mice displayed decreased body weights starting from 11 weeks of age (Figure 1E), most likely because of the severe diabetic phenotypes. Expectedly, the  $\beta$ -NIK-OE mice showed severe glucose intolerance with no insulin resistance (Figures 1F and 1G).

Decreased insulin level is the major cause of hyperglycemia in type 1 diabetes, and decreased serum C-peptide is a marker of type 1 diabetes. Therefore, we measured plasma insulin and C-peptide levels in  $\beta$ -NIK-OE and control mice. The feeding serum insulin levels were dramatically reduced by 86.3% (Figure 1H), and the serum C-peptide levels were decreased by 65% (Figure 1I), indicating severely impaired insulin secretion in male  $\beta$ -NIK-OE mice. Absolute insulin deficiency resulted in ketoacidosis as revealed by the dramatically increased serum  $\beta$ -hydroxybutyrate levels in  $\beta$ -NIK-OE mice (Figure 1J). The serum glucagon levels were significantly increased by about 2.8-fold in  $\beta$ -NIK-OE mice (Figure 1K), contributing to the hyperglycemia. Accordingly, pancreatic insulin contents were significantly decreased by 98.1%, whereas the glucagon contents were increased by about 1.83-fold in  $\beta$ -NIK-OE mice relative to the control mice (Figures 1L and 1M). Immuno-histological analyses showed that both the size of individual islets and the total islet area were significantly decreased in male  $\beta$ -NIK-OE mice as compared with the control mice (Figure 1N). The relative insulin-positive area was

dramatically decreased (Figure 1O), whereas the relative glucagon-positive area in the islets was significantly increased in  $\beta$ -NIK-OE mice (Figure 1P). These data indicate that insufficient secretion of insulin and higher levels of serum glucagon thus contribute to the observed hyperglycemia in male  $\beta$ -NIK-OE mice.

#### **$\beta$ -NIK-OE Mice at a Young Age Display Increased $\beta$ Cell Death and Glucose Intolerance**

Islet  $\beta$  cell death may have occurred at an early age in  $\beta$ -NIK-OE mice, which contributed to the dramatic reduction of insulin-positive areas at an old age (18 weeks of age). To test this hypothesis, we measured islet  $\beta$  cell apoptosis by TUNEL staining in  $\beta$ -NIK-OE mice at a young age (8 weeks of age). Pancreatic sections were co-immunostained with anti-insulin antibody to visualize  $\beta$  cells. The number of TUNEL-positive  $\beta$  cells was significantly more in  $\beta$ -NIK-OE mice than that in control mice (Figure 2A), which caused a significant reduction of islet  $\beta$  cell mass in  $\beta$ -NIK-OE mice at 8 weeks of age (Figure 2B). As expected,  $\beta$ -NIK-OE mice at a young age (8 weeks of age) also showed severe glucose intolerance with no insulin resistance (Figures 2C and 2D). We did not observe any difference in the insulin content between  $\beta$ -NIK-OE and control mice at birth ( $\beta$ -NIK-OE:  $2,398.4 \pm 501.9$  ng/mg protein,  $n = 5$ ; control:  $2,165.9 \pm 285.1$  ng/mg protein,  $n = 7$ ;  $p = 0.6751$ ), which indicates that  $\beta$ -NIK-OE of NIK does not affect the embryonic development of  $\beta$  cells. Taken together, these data suggest that increased apoptosis of  $\beta$  cells contributes to the reduced islet  $\beta$  cell mass and the decreased serum insulin levels observed in the adult  $\beta$ -NIK-OE mice.

#### **$\beta$ -NIK-OE Mice at a Young Age Display Increased Lymphocyte Infiltration in Islets**

It has been well-known that type 1 diabetes is associated with increased lymphocyte infiltration in islets, which contributes to the disease progression in both NOD mice and human patients with type 1 diabetes.<sup>1,13</sup> Immunostaining data showed that both B220<sup>+</sup> and CD3<sup>+</sup> lymphocytes were significantly increased in islets of  $\beta$ -NIK-OE mice (Figures 3A and 3B), suggesting that  $\beta$ -NIK-OE mice developed insulinitis and lymphocyte infiltration. To further confirm the infiltration of lymphocytes into islets, we performed flow cytometry. At 6 weeks of age, the percentage of CD45.2<sup>+</sup> CD3<sup>+</sup> T cells in islets was about 1.16% in  $\beta$ -NIK-OE mice (Figures 3C and 3D; Figure S2), whereas only 0.06% of the total cells were CD45.2<sup>+</sup> CD3<sup>+</sup> T cells in the islets of control mice. About 0.4% of all cells were CD8<sup>+</sup> T cells and 0.18% were CD4<sup>+</sup> T cells in the  $\beta$ -NIK-OE islets (Figures 3C and 3D; Figure S2), whereas fewer CD4<sup>+</sup> and CD8<sup>+</sup> T cells were observed in the control islets (Figures 3C and 3D; Figure S2). These data indicate that  $\beta$ -NIK-OE leads to

blood glucose levels were measured every week from 3 to 18 weeks of age ( $\beta$ -NIK-OE:  $n = 6-9$ ; control:  $n = 6-11$ ). (E) Body weights of male  $\beta$ -NIK-OE mice and control littermates ( $\beta$ -NIK-OE:  $n = 6-9$ ; control:  $n = 6-11$ ). (F and G) Glucose tolerance test (GTT) (F) and insulin tolerance test (ITT) (G) were measured in male  $\beta$ -NIK-OE and control mice at 18 weeks of age ( $\beta$ -NIK-OE:  $n = 6$ ; control:  $n = 7$ ). (H–K) Serum insulin (H), C-peptide (I),  $\beta$ -hydroxybutyrate (J), and glucagon (K) levels were measured in male  $\beta$ -NIK-OE and control mice at 18 weeks of age ( $\beta$ -NIK-OE:  $n = 11$ ; control:  $n = 10-12$ ). (L and M) Pancreas insulin (L) and glucagon (M) contents were measured in male  $\beta$ -NIK-OE and control mice at 18 weeks of age ( $\beta$ -NIK-OE:  $n = 11$ ; control:  $n = 12$ ). (N) Representative islets from male  $\beta$ -NIK-OE mice and control littermates at 18 weeks of age were immunostained with insulin and glucagon. The scale bar represents 100  $\mu$ m. (O) Relative insulin-positive areas of male  $\beta$ -NIK-OE mice and control littermates at 18 weeks of age ( $\beta$ -NIK-OE:  $n = 5$ ; control:  $n = 5$ ). (P) Ratio of islet glucagon-positive area/islet areas in male  $\beta$ -NIK-OE mice and control littermates at 18 weeks of age ( $\beta$ -NIK-OE:  $n = 5$ ; control:  $n = 5$ ). \* $p < 0.05$ , \*\* $p < 0.01$ . Data represent the mean  $\pm$  SEM.

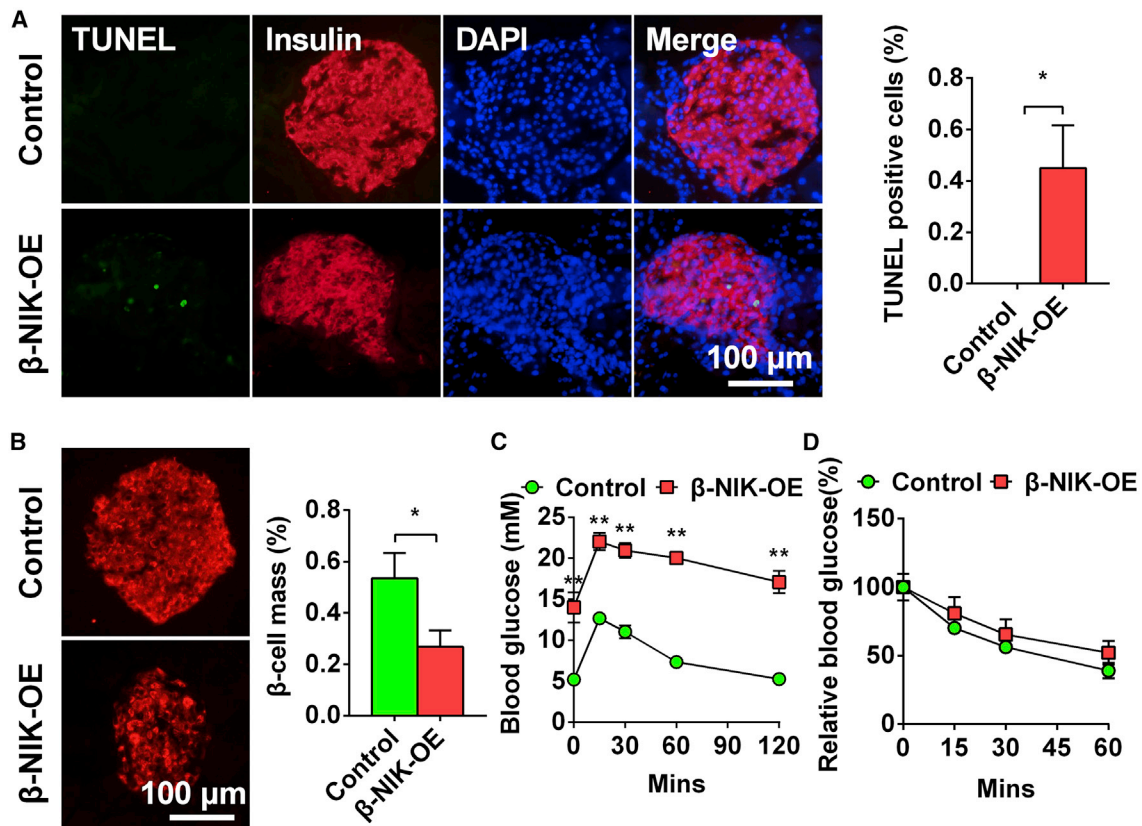

**Figure 2. β-NIK-OE Mice at Young Age Display Increased β Cell Death and Glucose Intolerance**

(A) Islet β cell apoptosis in male β-NIK-OE mice and control mice at 8 weeks of age was measured by TUNEL assays (β-NIK-OE: n = 5; control: n = 5). (B) Relative insulin-positive areas (β cell mass) of male β-NIK-OE mice and control littermates at 8 weeks of age (β-NIK-OE: n = 6; control: n = 5). The scale bars represent 100 μm. (C and D) Glucose tolerance test (GTT) (C) and insulin tolerance test (ITT) (D) were measured in male β-NIK-OE and control mice at 8 weeks of age (β-NIK-OE: n = 6–7; control: n = 8). \*p < 0.05, \*\*p < 0.01. Data represent the mean ± SEM.

lymphocyte infiltration, which further induces β cell death and diabetes.

Next, we performed qRT-PCR on cDNA from the islets of β-NIK-OE and control mice. Transcripts that demonstrated inflammation of the islets, including *Cxcl1*, *Cxcl10*, *Cxcl11*, and *Tnfr*, were all upregulated in 8 weeks of β-NIK-OE mice (Figure 3E). Coincident with T cell entry, we detected an upregulation of T cell-associated gene (*Cd3*) (Figure 3E). Finally, we analyzed canonical markers of B cells (*Cd19*) by qPCR. The expression of *Cd19* was significantly increased in the islets of β-NIK-OE mice (Figure 3E), further supporting the infiltration of B cells.

#### NIK Activation in Islet β Cells Inhibits Glucose-Stimulated Insulin Secretion

To determine whether NIK directly inhibits glucose-stimulated insulin secretion (GSIS), we isolated islets from β-NIK-OE and control mice and treated them with low (2.8 mM) and high (16.7 mM) glucose, respectively. Insulin secretion and islet insulin content were measured by ELISA. As shown in Figures 4A and 4B, GSIS

was dramatically decreased in the islets of β-NIK-OE mice, and the insulin content was also significantly reduced. Consistently, the expression of insulin-secretion-related genes, such as *Glut2* and *Gck*, was significantly decreased in the islets of β-NIK-OE mice. *Insulin1/2* mRNA levels were also decreased, which also contributed to the downregulation of insulin content. In addition to *Gck* (also named as MODY2), other MODYs (maturity-onset diabetes of the young), such as *Hnf4a* (MODY1), *Hnf1a* (MODY3), *Pdx1* (MODY4), *Hnf1b* (MODY5), and *Neurod1* (MODY6), were dramatically downregulated in the islets of β-NIK-OE mice (Figure 4C). These data demonstrate that the downregulation of insulin-secretion-related genes contributes to β cell failure and diabetes in β-NIK-OE mice.

#### NIK Activity Is Essential for NIK to Induce β Cell Failure

NIK is the key activator of the non-canonical NF-κB signaling pathway.<sup>4</sup> To determine whether NIK can regulate islet β cell function, we overexpressed NIK and NIK(KA) in INS-1 832/13 cells by infecting them with ad-NIK and ad-NIK(KA) adenovirus and then assessed insulin secretion and cell viability. NIK protein levels were very high in ad-NIK- and ad-NIK(KA)-infecting INS-1 832/13 cells



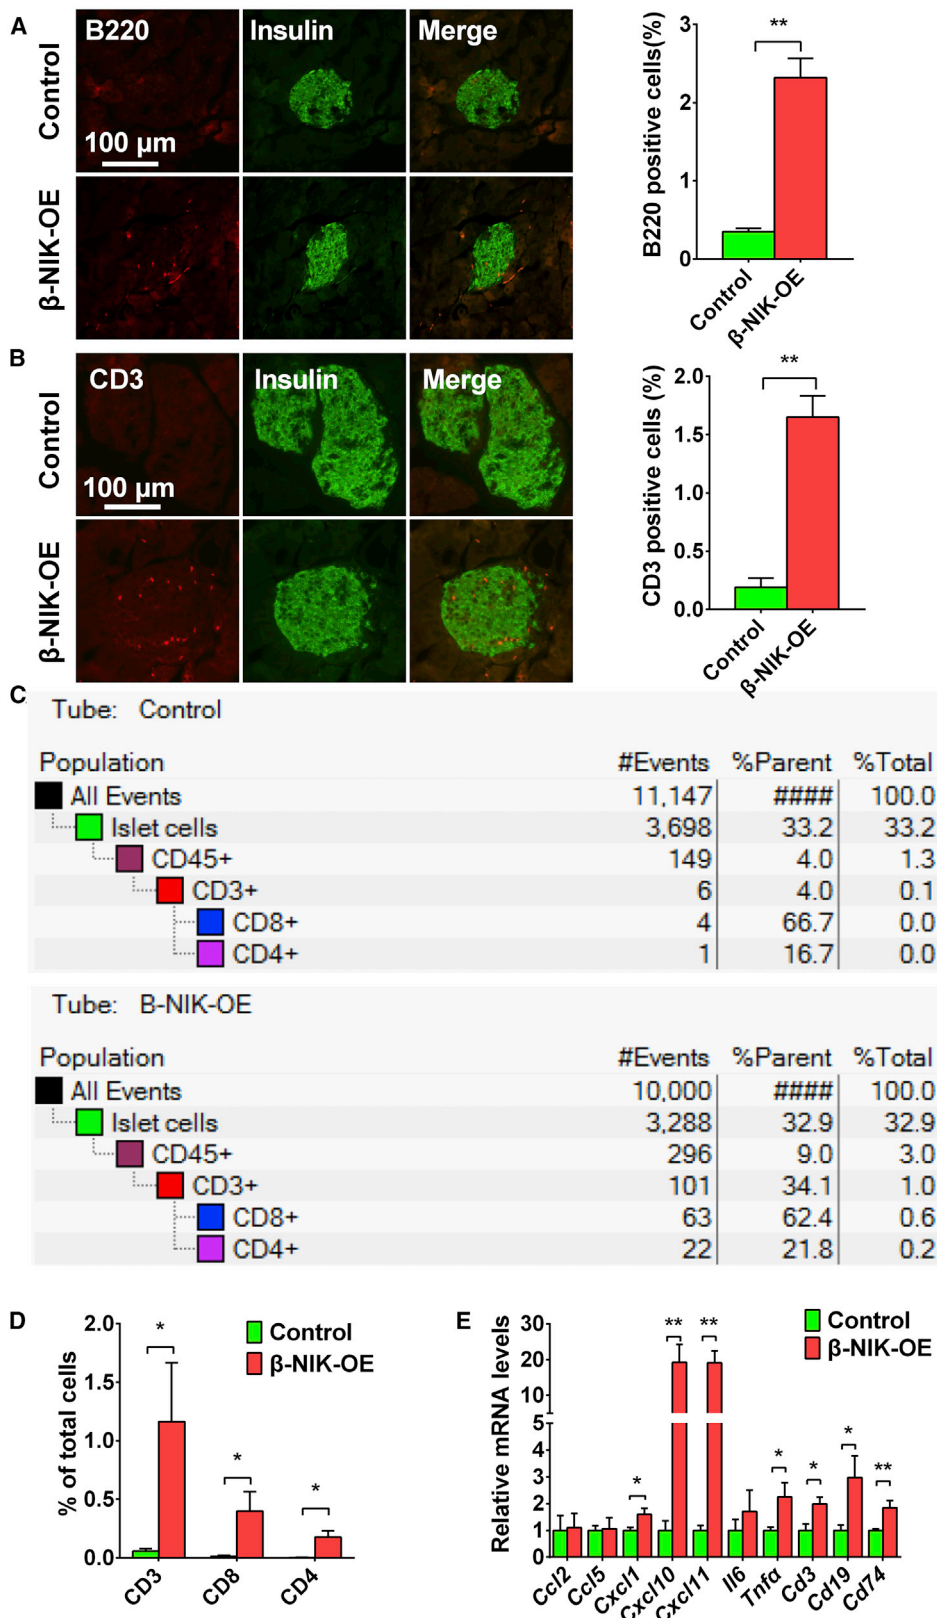

(legend on next page)

(Figure 5A). NIK, but not NIK(KA), induced p100-to-p52 processing (Figure 5A), which further supports the fact that KA mutations block the activation of the non-canonical NF- $\kappa$ B signaling pathway. As shown in Figure 5B, GSIS was present in the  $\beta$ -Gal control and NIK(KA) groups, whereas GSIS was completely blocked in NIK-overexpressing INS-1 832/13 cells. Moreover, insulin protein levels (insulin content) were significantly decreased in INS-1 832/13 cells after activation of NIK signaling (Figure 5C). Additionally, cell viability was significantly decreased (Figure 5D), and the number of TUNEL-positive cells was dramatically increased in NIK-overexpressing INS-1 832/13 cells (Figure 5E). However, the kinase death mutations NIK(KA) showed moderate effect on insulin content and cell death compared with the  $\beta$ -Gal control (Figures 5C–5E).

To further determine the molecular mechanisms involved in the NIK regulation of  $\beta$  cell function, we performed RNA sequencing (RNA-seq) analysis in  $\beta$ -Gal-overexpressing (control), NIK-overexpressing INS-1 832/13, and NIK(KA)-overexpressing INS-1 832/13 cells. As shown in Figure 5F, a total of 471 genes were upregulated and 249 genes were downregulated following NIK overexpression. Gene Ontology (GO) analysis indicated that the upregulated genes were primarily related to the immune response, whereas the downregulated genes were primarily related to insulin secretion (Figure 5G). The Kyoto Encyclopedia of Genes and Genomes (KEGG) pathway enrichment analysis showed that signaling pathways related to insulin secretion, protein processing in endoplasmic reticulum, and MODY were significantly decreased (Figure S3A), whereas immune signaling pathways, including the TNF, NF- $\kappa$ B, and antigen processing and presentation signaling pathways, were significantly activated by NIK overexpression in INS-1 832/13 cells (Figure S3B). NIK(KA), the dominant-negative mutant of NIK, does not induce the expression of genes related to immune response in INS-1 832/13 cells (Figure 5F).

Among the upregulated genes, the expression of TNF, NF- $\kappa$ B, and antigen processing and presentation signaling pathways were confirmed by qPCR (Figure 5H). Inflammation-related genes, such as *Il1*, *Tnfa*, *Ccl5*, *Cxcl1*, *Cxcl10*, and *Cxcl11*, were dramatically increased in NIK-overexpressing INS-1 832/13 cells (Figure 5H). Antigen-processing and -presentation-related genes, including *RT1-CE4*, *RT1-CE7*, *RT1-M2*, *RT1-M3*, *B2M*, *RT1-Ba*, and *RT1-Da*, were also significantly increased in NIK-overexpressing INS-1 832/13 cells (Figure 5H). However, NIK(KA), the dominant-negative mutant of NIK, suppressed the expression of genes related to inflammation (*Il6*, *Ccl11*, *Cxcl1*, and *Cxcl11*) and antigen presentation (*RT1-CE4*, *RT1-M2*,

*RT1-M3*, and *B2M*) in INS-1 832/13 cells (Figure 5H), indicating that the inhibition of NIK may prevent  $\beta$  cell dysfunction. Among the downregulated genes, the expression of insulin-secretion-related genes, such as *Gck*, *Glut2*, *Hnf1 $\alpha$* , *Hnf4 $\alpha$* , *Insulin1/2*, *Neurod1*, and *Pdx1*, was confirmed by qPCR (Figure 5H). However, NIK(KA) does not affect the expression of genes related to insulin secretion in INS-1 832/13 cells (Figure 5H). These data indicate that NIK activity is essential for NIK to inhibit GSIS and to induce cell death in  $\beta$  cells.

#### Inhibition of NIK Activity by Small Molecule B022 Prevents NIK- and H<sub>2</sub>O<sub>2</sub>-Induced $\beta$ Cell Death

We recently reported that B022 is a specific inhibitor of NIK activity, and B022 can ameliorate CCl<sub>4</sub>-induced liver injury and inflammation in mice.<sup>5,14</sup> To determine whether inhibition of NIK activity by B022 can prevent NIK-induced  $\beta$  cell failure, we infected INS-1 832/13 cells with ad-NIK adenovirus in the presence of B022 for 16 h, after which p100-to-p52 processing, cell viability, and gene expression were measured. As expected, B022 (10  $\mu$ M) completely blocked NIK-induced p100-to-p52 processing (Figure 6A). B022 also dose-dependently prevented NIK- or H<sub>2</sub>O<sub>2</sub>-induced cell death (Figures 6B and 6C). Furthermore, B022 dose-dependently rescued the inhibitory effects of NIK on genes related to insulin secretion, such as *Insulin1/2*, *Pdx-1*, and *Neurod1* (Figure 6D). The induction of genes related to inflammation, such as *Cxcl1*, *Il1*, *Il6*, and *Tnfa*, was blocked by B022 (Figure 6E). The induction of genes related to antigen processing and presentation, such as *RT1-Ba*, *RT1-Da*, and *RT1-M2*, was also dramatically inhibited by B022 (Figure 6F). These data demonstrate that NIK directly impairs  $\beta$  cell function and its kinase activity is essential for NIK- or H<sub>2</sub>O<sub>2</sub>-induced  $\beta$  cell death.

#### Inhibiting the Kinase Activation of NIK by B022 Ameliorates STZ-Induced Diabetes in Mice

To further determine whether the inhibition of NIK activity by B022 can ameliorate STZ-induced diabetes *in vivo*, we intraperitoneally injected C57BL/6 wild-type (WT) mice with a high dose of STZ to induce diabetes and then injected B022 or vehicles via tail veins four times a day as shown in Figure 7A. STZ is able to increase blood glucose levels in C57BL/6 WT mice (Figure 7B). Intravenous administration of B022 ameliorated STZ-induced hyperglycemia (Figure 7B) and glucose intolerance (Figure 7C). The insulin sensitivity determined by insulin tolerance test (ITT) was similar between B022- and vehicle-treated mice (Figure 7D). B022 also ameliorated STZ-induced  $\beta$  cell death as revealed by higher serum insulin levels (Figure 7E), a higher pancreas insulin content (Figure 7F), and a higher  $\beta$  cell mass (Figures

### Figure 3. $\beta$ -NIK-OE Mice Display Increased Lymphocyte Infiltration in Islets at Young Age

(A) B lymphocytes were immunostained with anti-B220 antibody. Pancreatic sections were also immunostained with anti-insulin antibody to identify islet  $\beta$  cells ( $\beta$ -NIK-OE: n = 6; control: n = 5). (B) T lymphocytes were immunostained with anti-CD3 antibody in pancreatic sections of male  $\beta$ -NIK-OE mice and control mice at 8 weeks of age. Pancreatic sections were also immunostained with anti-insulin antibody to identify islet  $\beta$  cells ( $\beta$ -NIK-OE: n = 5; control: n = 6). The scale bars represent 100  $\mu$ m. (C) Islets were isolated from male  $\beta$ -NIK-OE mice and control mice at 6 weeks of age. Single cells were dispersed and subjected to FACS analysis. Representative FACS plots of staining for total T (CD45.2<sup>+</sup>CD3<sup>+</sup>) cells, CD4 T (CD45.2<sup>+</sup>CD3<sup>+</sup>CD4<sup>+</sup>) cells, and CD8 T (CD45.2<sup>+</sup>CD3<sup>+</sup>CD8<sup>+</sup>) cells were presented. (D) Quantification of FACS data ( $\beta$ -NIK-OE: n = 3 pooled samples; control: n = 4 pooled samples; each pooled sample contained islet cells from 2–8 mice). (E) mRNA levels in islets of male  $\beta$ -NIK-OE mice and control mice were measured by qRT-PCR ( $\beta$ -NIK-OE: n = 7; control: n = 7). \*p < 0.05, \*\*p < 0.01. Data represent the mean  $\pm$  SEM.

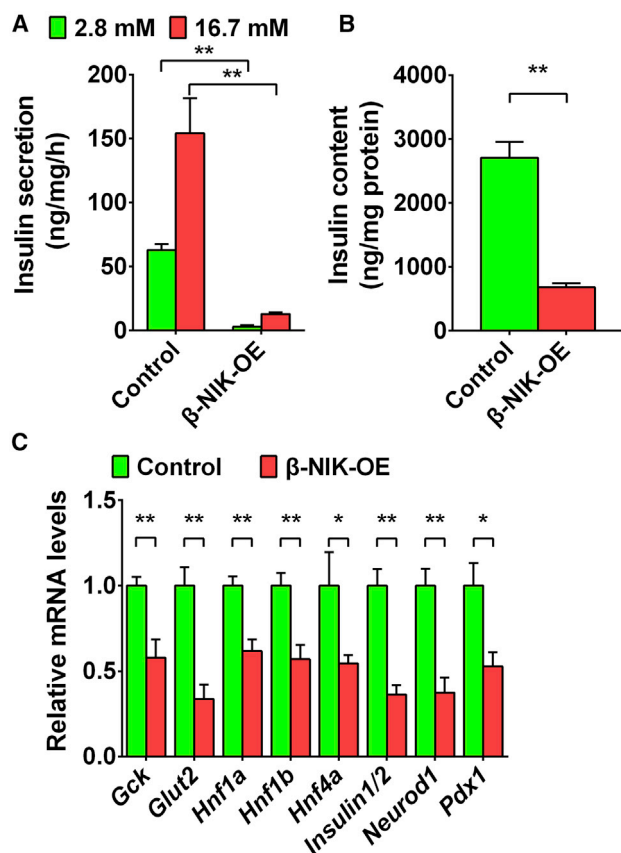

**Figure 4. NIK Activation in Islet  $\beta$  Cells Inhibits Glucose-Stimulated Insulin Secretion**

(A and B) Islets were isolated from male  $\beta$ -NIK-OE and control mice (8 weeks of age) and treated with low (2.8 mM) glucose for 1 h and then high (16.7 mM) glucose for 1 h. Insulin secretion (A) and islet insulin content (B) were measured by ELISA ( $\beta$ -NIK-OE:  $n = 5$ ; control:  $n = 5$ ). (C) The expression of genes related to insulin secretion (*Gck*, *Glut2*, *Hnf1 $\alpha$* , *Hnf1 $\beta$* , *Hnf4 $\alpha$* , *Insulin1/2*, *Neurod1*, and *Pdx1*) was measured by qRT-PCR ( $\beta$ -NIK-OE:  $n = 7$ ; control:  $n = 7$ ). \* $p < 0.05$ , \*\* $p < 0.01$ . Data represent the mean  $\pm$  SEM.

7G and 7H) in B022-treated mice. Together, these results demonstrate that B022 ameliorates STZ-induced diabetes, indicating that inhibition of NIK activity by a small molecule could be a potential strategy for the treatment of diabetes.

## DISCUSSION

GWAS has shown that an SNP rs17759555 of *NIK* (*MAP3K14*) is associated with type 1 diabetes.<sup>10</sup> Some indirect evidence shows that the activation of NIK by cytokine treatment, small molecules, or  $\beta$  cell-specific deletion of negative regulators (TRAF2 or TRAF3) of NIK impaired islet  $\beta$  cell function both *in vitro* and *in vivo*.<sup>3,12</sup> However, direct evidence is still lacking, and whether or not activation of NIK leads to diabetes is still largely unknown. In this study, we provided direct evidence of the fact that NIK plays a key role in the progression of diabetes. Islet  $\beta$ -NIK-OE results in diabetes at a very early age, which is due to insulin deficiency,  $\beta$  cell death, and insulinitis.

These observations indicate that islet  $\beta$  cell failure induced by NIK is directly linked to diabetes.

Our results demonstrate that NIK activation leads to diabetes through several pathways. Overexpression of NIK in islet  $\beta$  cells results in impaired insulin synthesis and secretion, both *in vitro* and *in vivo*, and this is most likely due to decreased expression of MYODs (*Hnf4 $\alpha$*  [MODY1], *Hnf1 $\alpha$*  [MODY3], *Pdx1* [MODY4], *Hnf1 $\beta$*  [MODY5], *Neurod1* [MODY6]), *insulin1/2*, and *Glut2*. In addition, overexpression of NIK causes islet  $\beta$  cell death both *in vitro* and *in vivo*, leading to a dramatically decreased islet  $\beta$  cell mass, further contributing to hypoinsulinemia in  $\beta$ -NIK-OE mice. In addition, glucagon-positive cell mass and serum glucagon levels were significantly increased in  $\beta$ -NIK-OE mice, which is similar to the phenotypes observed in type 1 diabetes.<sup>15–17</sup> It has been shown that up-regulated  $Ca^{2+}$ -dependent activity of mTOR in  $\alpha$  cells leads to increased proliferation in recent-onset type 1 diabetes, which is due to the insufficient release of GABA from the  $\beta$  cells.<sup>17</sup> Whether or not this mechanism also happens in  $\beta$ -NIK-OE mice needs to be further tested in the future. Insufficient secretion of insulin and higher levels of serum glucagon thus contribute to the observed hyperglycemia in  $\beta$ -NIK-OE mice.

Islet inflammation and insulinitis may also contribute to the diabetic phenotypes in  $\beta$ -NIK-OE mice. Overexpression of NIK causes the induction of cytokines, chemokines, antigen-processing- and -presentation-related factors, such as major histocompatibility complex (MHC) class I and class II, both *in vitro* and *in vivo*. These inflammatory factors (such as cytokines and chemokines) and danger signals from dying islet  $\beta$  cells could induce immune cell infiltration during the early development of diabetes.<sup>1</sup> The percentage of CD45.2<sup>+</sup> cells in islets is significantly increased in  $\beta$ -NIK-OE mice as compared with control mice. CD3<sup>+</sup> T cells, including CD4<sup>+</sup> and CD8<sup>+</sup> T cells within the islets, are significantly increased in  $\beta$ -NIK-OE mice, whereas fewer CD3<sup>+</sup> T cells were observed in the islets of control mice. It is still unknown whether these immune cells in the islets also contribute to  $\beta$  cell death in  $\beta$ -NIK-OE mice. However, the inhibition of NIK activity either by NIK(KA) or by the small molecule B022 completely blocks NIK-induced inflammation, which indicates that NIK activity is essential for the induction of inflammation.

TRAF2 and TRAF3 negatively regulate NIK protein levels.<sup>9</sup> It has been shown that TRAF2/TRAF3 deficiency in  $\beta$  cells increases NIK and p52 protein levels, which leads to impaired  $\beta$  cell function.<sup>3</sup> In this work, we show that NIK overexpression specifically in  $\beta$  cells causes  $\beta$  cell death and diabetes. These data consistently show that activation of the noncanonical NF- $\kappa$ B signaling pathway results in  $\beta$  cell dysfunction. However, even though the induction of p52 protein levels is similar, the phenotypes in  $\beta$ -NIK-OE mice are more significant than that in  $\beta$ TRAF2KO or  $\beta$ TRAF3KO mice, and the transcriptional changes in  $\beta$ TRAF2KO,  $\beta$ TRAF3KO, and NIK-overexpressing  $\beta$  cells only partially overlap. These data indicate that NIK may have other targets, which needs to be further studied in the future.

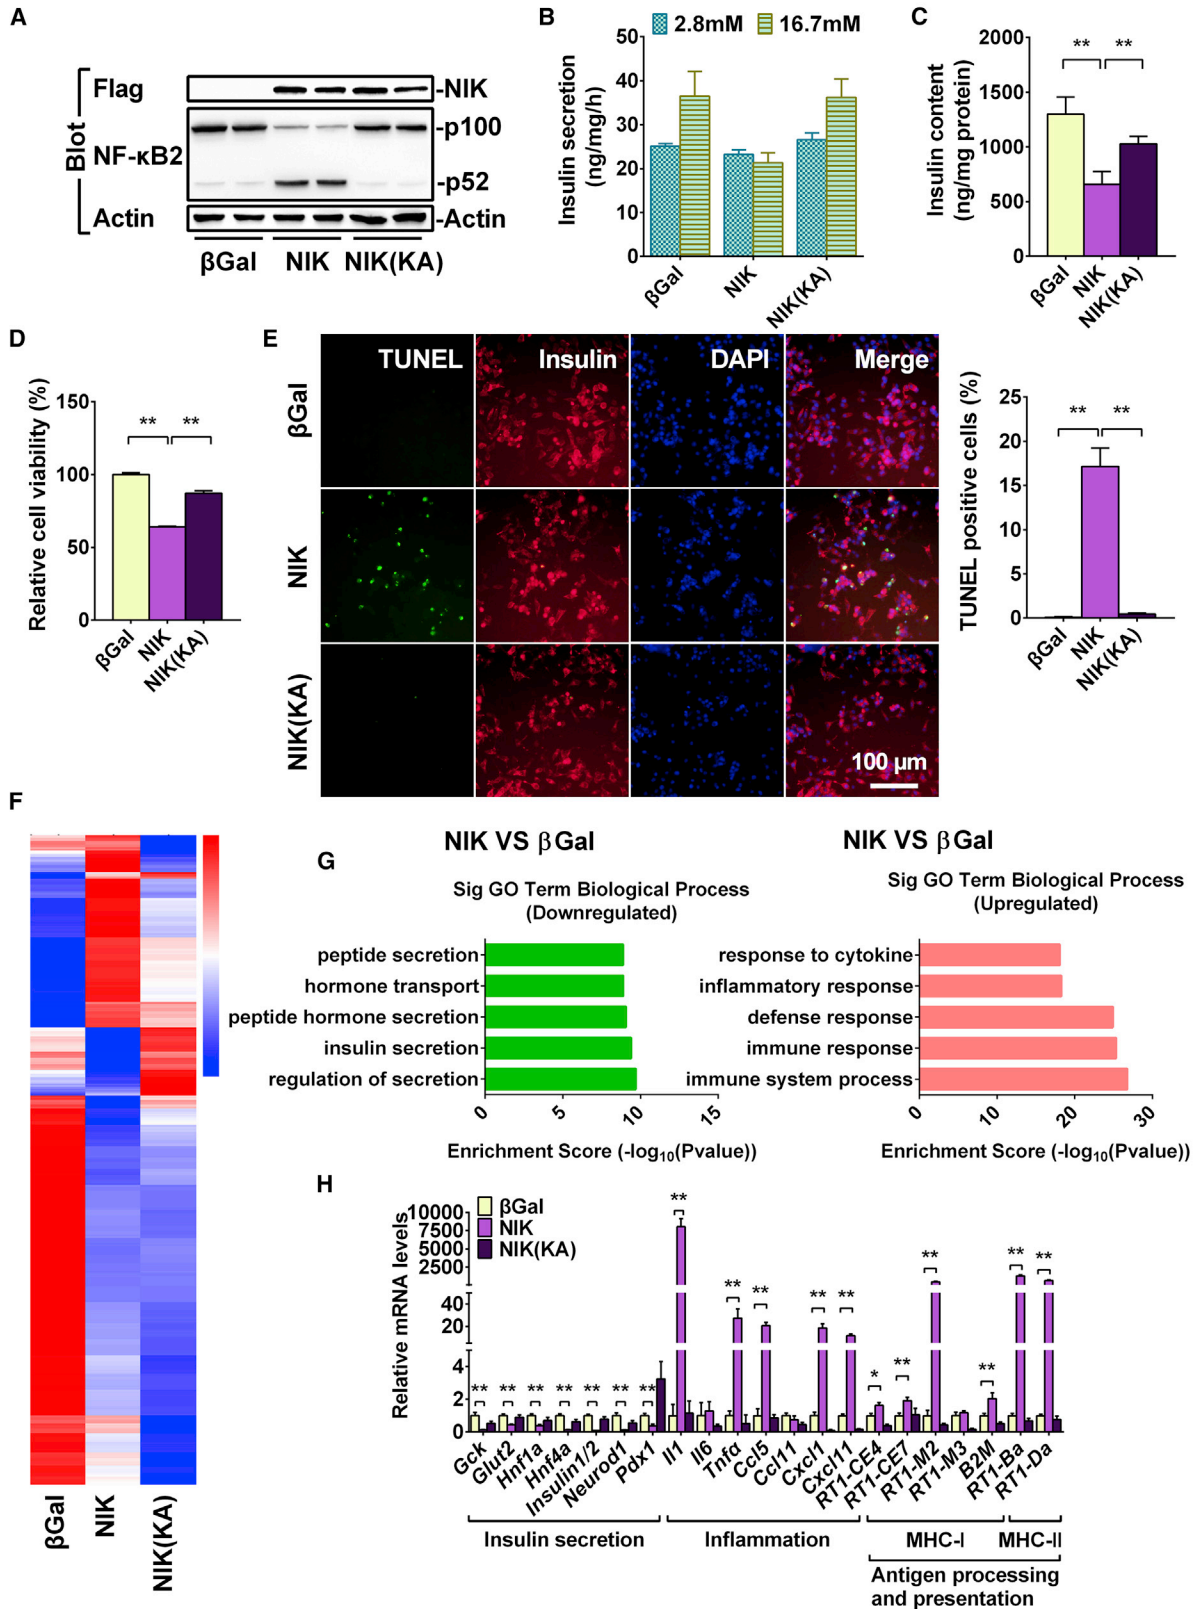

(legend on next page)



NIK overexpression in  $\beta$  cells leads to impaired insulin secretion,  $\beta$  cell death, and inflammation. Inflammation could cause impaired insulin secretion and induce  $\beta$  cell death in both type 1 and type 2 diabetes.<sup>1,2,18</sup> NIK-induced inflammation surely contributes to impaired insulin secretion and induces  $\beta$  cell death. NIK may also inhibit insulin secretion independent of inflammation. The molecular mechanisms need to be further studied. Due to the impaired insulin secretion,  $\beta$  cell death, and insulinitis, 100% of male  $\beta$ -NIK-OE mice develop NOD at 10 weeks of age that is much earlier than that in NOD mice. Compared with NOD mice,  $\beta$ -NIK-OE mice show clear advantages in that 100% of male mice develop stable diabetic phenotypes at a very early age (10 weeks of age). Therefore,  $\beta$ -NIK-OE mice may be a diabetes mouse model for basic study and drug screening.

NIK activity is essential for NIK or oxidative stress to induce  $\beta$  cell dysfunction, such as  $\beta$  cell death, inflammation, and decreased insulin synthesis and secretion. Inhibition of NIK by either NIK(KA) mutation or small molecule B022 prevents NIK-induced cell death, inflammation, and inhibitory effects of insulin secretion. B022 also prevents H<sub>2</sub>O<sub>2</sub>-induced  $\beta$  cell death. Intravenous administration of B022 ameliorates STZ-induced hyperglycemia,  $\beta$  cell death, and hypoinsulinemia. However, it should be noted that the *in vivo* pharmacokinetic properties of B022 are not good.<sup>5,14</sup> Therefore, multiple injections of B022 per day are required to achieve the *in vivo* inhibition of STZ-induced  $\beta$  cell death and hyperglycemia. To determine whether inhibition of NIK in  $\beta$  cells by small molecules can ameliorate diabetes in the chronic mouse models (e.g., multiple low-dose STZ injections or NOD mice), further modifications to B022 are required.

In conclusion, we have provided direct evidence that NIK plays a key role in  $\beta$  cell function. Islet  $\beta$ -NIK-OE induces diabetes at a very early age by inducing the expression of cytokines and chemokines, and causing immune cell infiltration and  $\beta$  cell death. NIK activity is essential for NIK or oxidative stress to induce islet  $\beta$  cell failure. Inhibition of NIK by small molecule B022 ameliorates STZ-induced  $\beta$  cell death and hyperglycemia. These data suggest that NIK might be a drug target for the treatment of diabetes.

## MATERIALS AND METHODS

### Animal Experiments

Animal experiments were carried out in strict accordance with the *Guide for the Care and Use of Laboratory Animals* published by the National Institutes of Health (NIH publication no. 85-23, revised

1996). Animal experiment protocols were approved by the Institutional Animal Care and Use Committee of Harbin Institute of Technology (IACUC/HIT). The approval number is IACUC-2018001. *STOP-NIK* and *Rip-Cre* mice (C57BL/6J background) were described previously.<sup>5,11,19</sup> *STOP-NIK* mice were crossed with *Rip-Cre* mice to generate islet  $\beta$ -NIK-OE mice. Mice were housed on a 12-h light/12-h dark cycle and fed a normal chow with free access to water. We used male  $\beta$ -NIK-OE (homozygous *STOP-NIK* with heterozygous *Rip-Cre*) and control mice (homozygous *STOP-NIK*) for all of the experiments. Blood glucose was monitored daily or weekly and after two consecutive readings of  $\geq 11.1$  mM (200 mg/dL), mice were considered diabetic. Blood glucose levels were measured as described previously.<sup>5</sup> Blood samples were collected from orbital sinus. Serum glucagon and insulin levels were measured using glucagon ELISA kits (DGCG0; R&D Systems) and insulin ELISA kits (MS100; EZassay), respectively. The detailed information of the reagents was listed in Table S1.

### Cell Cultures, Adenoviral Infection, and GSIS

INS-1 832/13 cells were cultured at 37°C and 5% CO<sub>2</sub> in RPMI-1640 medium supplemented with 10% FBS and 50 mmol/L  $\beta$ -mercaptoethanol as shown previously.<sup>20</sup> INS-1 832/13 cells were infected with  $\beta$ -Gal, NIK, and NIK(KA) adenovirus for 48 h and subjected to MTT and TUNEL assays. For GSIS assay, INS-1 832/13 cells were infected with  $\beta$ -Gal, NIK, and NIK(KA) adenovirus for 16 h, and these cells were incubated at 37°C in 200  $\mu$ L of Hank's balanced salt solution (HBSS) (pH 7.4) containing 2.8 or 16.7 mM glucose for 1 h. Islets were isolated from  $\beta$ -NIK-OE and control mice. After overnight culture, islets were incubated at 37°C in 200  $\mu$ L of HBSS (pH 7.4) containing 2.8 mM glucose for 1 h and then in HBSS containing 16.7 mM glucose for 1 h. The medium was collected to measure GSIS. Cells or islets were then harvested in a lysis buffer, and protein concentrations were measured. The cell extracts were then mixed with acid-ethanol (1.5% HCl in 70% EtOH) and used to measure the insulin content. Insulin secretion and insulin content were measured using a rat insulin RIA kit (Linco Research, St. Charles, MO, USA) or insulin ELISA kits (MS100; EZassay) and normalized to protein levels.

### Immunoblotting

INS-1 832/13 cells were harvested in a lysis buffer (R0020; Solarbio). Cell extracts were immunoblotted with the indicated antibodies and visualized using the enhanced chemiluminescence (ECL). Antibody

### Figure 5. NIK Activity Is Essential for NIK to Induce $\beta$ Cell Failure

INS-1 832/13 cells were infected with  $\beta$ -Gal, NIK, and NIK(KA) adenovirus for 16 h. Insulin secretion, RNA-seq, and qRT-PCR analysis were performed in  $\beta$ -Gal-overexpressing (control), NIK-overexpressing, and NIK(KA)-overexpressing INS-1 832/13 cells. (A) Flag-NIK, NF- $\kappa$ B2, and Tubulin protein levels were measured by immunoblotting. (B) Glucose (16.7 mM)-stimulated insulin secretion (GSIS) was measured by ELISA (n = 3–4 for each group). (C) Insulin content was measured by ELISA (n = 4). (D and E) Cell viability (D) and the number of TUNEL-positive cells (E) were measured after virus infection for 48 h (n = 5–6 for each group). The scale bar represents 100  $\mu$ m. (F) Heatmap derived from RNA-seq expression data of the differentially expressed genes (DEGs) ( $|\log_2(\text{FoldChange})| > 1$  and  $q < 0.005$ ). (G) Top GO biological process terms enriched in downregulated and upregulated genes in NIK-overexpressing INS-1 832/13 cells compared with  $\beta$ -Gal control. (H) The expression of genes related to inflammation (*Il1*, *Il6*, *Tnf $\alpha$* , *Ccl5*, *Ccl11*, *Cxcl1*, *Cxcl10*, and *Cxcl11*), antigen presentation (*RT1-CE4*, *RT1-CE7*, *RT1-M2*, *RT1-M3*, *B2M*, *RT1-Ba*, and *RT1-Da*), and insulin secretion (*Gck*, *Glut2*, *Hnf1 $\alpha$* , *Hnf1 $\beta$* , *Hnf4 $\alpha$* , *Insulin1/2*, *Neurod1*, and *Pdx-1*) was measured by qRT-PCR (n = 6 for each group). \*p < 0.05, \*\*p < 0.01. Data represent the mean  $\pm$  SEM.

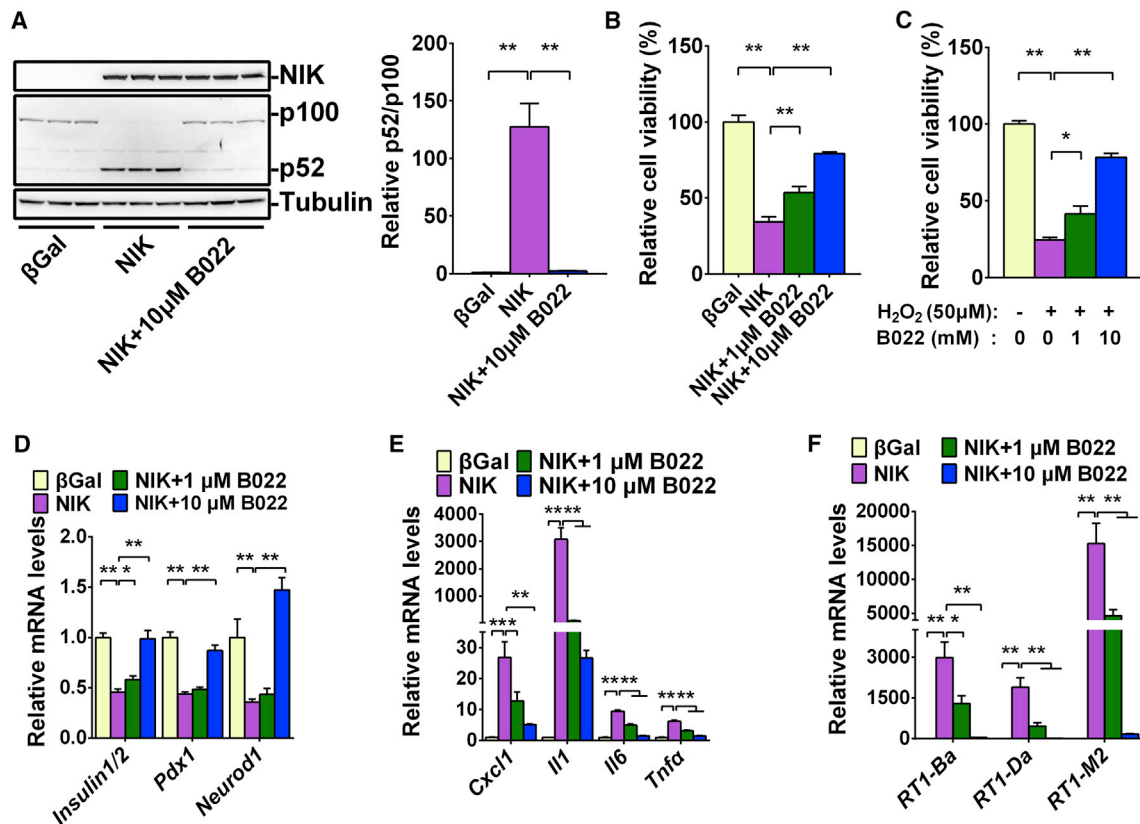

**Figure 6. Inhibition of NIK Activity by Small Molecule B022 Prevents NIK- or H<sub>2</sub>O<sub>2</sub>-Induced β Cell Failure *In Vitro***

INS-1 832/13 cells were infected with NIK adenovirus in the presence of B022 at different doses (0, 1, and 10 μM) for 16 h. (A) Flag-NIK, NF-κB2, and Tubulin protein levels were measured by immunoblotting. The quantification of p52/p100 was present on the right (n = 3 for each group). (B) Cell viability was measured by MTT (n = 6 for each group). (C) INS-1 832/13 cells were treated with H<sub>2</sub>O<sub>2</sub> (50 μM) in the presence of B022 at different doses (0, 1, and 10 μM) for 16 h. Cell viability was measured by MTT (n = 5 for each group). (D–F) The expression of genes related to insulin secretion (*Insulin1/2*, *Pdx1*, and *Neurod1*) (D), inflammation (*CXCL1*, *IL1*, *IL6*, and *TNFA*) (E), and antigen presentation (*RT1-Ba*, *RT1-Da*, and *RT1-M2*) (F) was measured by qRT-PCR (n = 5–6 for each group). \*p < 0.05, \*\*p < 0.01. Data represent the mean ± SEM.

dilution ratios were as follows: FLAG (F1804, 1:5,000 dilution; Sigma), NF-κB2 (4882, 1:2,000; CST), β-actin (60008-1-Ig; 1:5,000; Proteintech), IκBα (10268-1-AP, 1:2,000; Proteintech), and Tubulin (sc5286, 1:5,000 dilution; Santa Cruz).

#### Quantitative Real-Time PCR Analysis

Total RNAs were extracted using TriPure Isolation Reagent (Roche, Mannheim, Germany), and the first-strand cDNAs were synthesized using random primers and M-MLV reverse transcriptase (Promega, Madison, WI, USA) as shown before.<sup>5,11,21</sup> Gene expression was quantified by the comparative threshold cycle ( $\Delta\Delta CT$ ) method, and results were normalized to the expression of 36B4. Primers for quantitative real-time PCR were listed in Table S2.

#### Immunostaining and TUNEL Assays

Immunostaining was performed as shown previously.<sup>11,20</sup> In brief, pancreata were fixed in 4% paraformaldehyde for 3 h and then in 30% sucrose overnight. Five frozen pancreatic sections (8–10 μm, spaced >200 μm apart) for each mouse were taken for staining and

analyzing. These sections were stained with the indicated antibodies (Table S1). The dilution ratios were as follows: insulin (A0564, 1:1,000 dilution; Dako), glucagon (G2654, 1:1,000 dilution; Sigma), LTβR (20331-1-AP, 1:200 dilution; Proteintech), CD3 (100236, 1:100 dilution; BioLegend), and B220 (103222, 1:100 dilution; BioLegend). Islet insulin- and glucagon-positive areas were measured using ImageJ software and normalized to pancreatic section areas. TUNEL assays were performed by using cell death detection kits (Roche Diagnostics) following the manufacturer's recommended procedure. The sections were also stained with DAPI to visualize total cells. Cell number was counted manually.

#### Fluorescence-Activated Cell Sorting (FACS) Analysis

Pancreatic islets were isolated from β-NIK-OE and control mice at 6 weeks of age following a published protocol.<sup>11,20</sup> Islets were hand-picked from β-NIK-OE and control mice. Islets were pooled from two to eight β-NIK-OE and control mice. Each genotype included three to four pooled samples. Single cells were dispersed by shaking islets in Ca<sup>2+</sup>- and Mg<sup>2+</sup>-free Hank's buffered solution containing

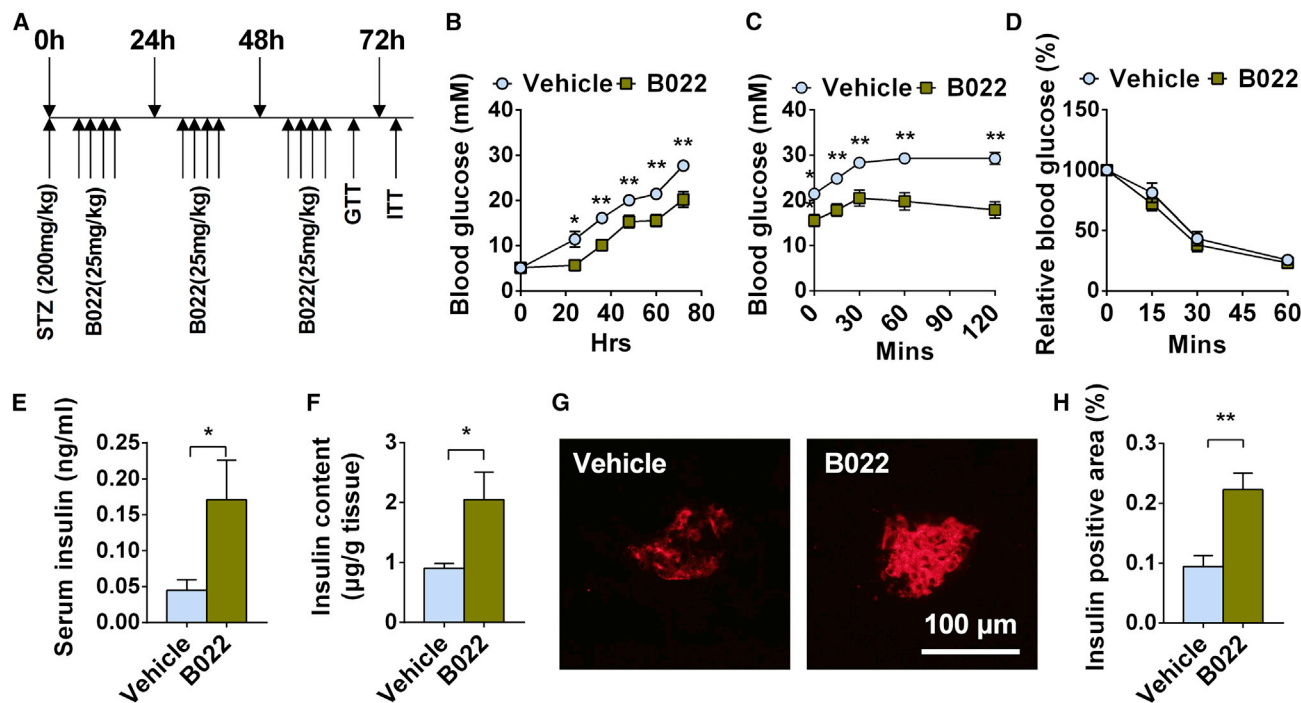

**Figure 7. Inhibition of NIK Activity by Small Molecule B022 Ameliorates STZ-Induced Diabetes *In Vivo***

C57BL6 WT mice were intraperitoneally injected with a high dose of STZ (200 mg/kg) to induce diabetes, and then B022 or vehicles were injected via tail vein four times per day. (A) Experiment schedule. (B) Blood glucose ( $n = 10$  for each group). (C) Glucose tolerance test (GTT) ( $n = 10$  for each group). (D) Insulin tolerance test (ITT) ( $n = 7$  for each group). (E) Serum insulin levels ( $n = 10$  for each group). (F) Pancreas insulin contents ( $n = 10$  for each group). (G) Representative islets from B022- and vehicle-treated mice were immunostained with insulin. The scale bar represents 100  $\mu\text{m}$ . (H) Relative insulin-positive areas of B022- and vehicle-treated mice ( $n = 6-7$  for each group). \* $p < 0.05$ , \*\* $p < 0.01$ . Data represent the mean  $\pm$  SEM.

1 mM EGTA and 10 mg/mL BSA. Dispersed single cells were stained with indicated antibodies as shown in Table S1. The dates were collected with a BD FACSAria III flow cytometer with three laser lines (405, 488, and 633 nm).

#### RNA Sequencing

INS-1 832/13 cells were infected with  $\beta$ -Gal, NIK, and NIK(KA) adenovirus for 16 h. Islet total RNAs were extracted using TriPure Isolation Reagent (Roche, Mannheim, Germany). RNA-seq was performed by using HiSeq X Ten platform. Paired-end clean reads were aligned to the Rat reference genome with TopHat (version 2.0.12), and the aligned reads were used to quantify mRNA expression by using HTSeq-count (version 0.6.1) as described previously.<sup>11,22</sup> RNA-seq data that support the findings of this study have been deposited in GEO under accession code GEO: GSE130121.

#### Statistical Analysis

Data were presented as means  $\pm$  SEM. Differences between groups were analyzed by two-tailed Student's *t* tests.  $p < 0.05$  was considered statistically significant.

#### SUPPLEMENTAL INFORMATION

Supplemental Information can be found online at <https://doi.org/10.1016/j.ymthe.2020.07.016>.

#### AUTHOR CONTRIBUTIONS

X.L. performed most of the experiments. Y.W., Y.S., N.D., M.L., and L.J. researched data. Y.Z. synthesized B022. M.L. nicely provided *Rip-Cre* mice and reviewed the manuscript. Z.C. designed the project, researched data, and wrote the manuscript.

#### CONFLICTS OF INTEREST

The authors declare no competing interests.

#### ACKNOWLEDGMENTS

This study was supported by the National Natural Science Foundation of China (grants 31671225 and 31971083 to Z.C., 81872724 to Y.Z., and 81570699, 81620108004, and 81830025 to M.L.); the National Natural Science Foundation of Heilongjiang Province of China (grant YQ2019C011 to Z.C.); and Tianjin Municipal Science and Technology Commission (grant 17ZXMSFY00150 to M.L.). X.L. is supported by the Chinese Postdoctoral Science Foundation (grant AUGA4130900619). We thank Dr. Zhongyu Zhang for assistance with the FACS experiment. We also thank Novogene for the assistance with RNA sequencing.

#### REFERENCES

- Eizirik, D.L., Colli, M.L., and Ortis, F. (2009). The role of inflammation in insulinitis and  $\beta$ -cell loss in type 1 diabetes. *Nat. Rev. Endocrinol.* 5, 219–226.

2. Donath, M.Y., Dalmas, É., Sauter, N.S., and Böni-Schnetzler, M. (2013). Inflammation in obesity and diabetes: islet dysfunction and therapeutic opportunity. *Cell Metab.* *17*, 860–872.
3. Malle, E.K., Zammit, N.W., Walters, S.N., Koay, Y.C., Wu, J., Tan, B.M., Villanueva, J.E., Brink, R., Loudovaris, T., Cantley, J., et al. (2015). Nuclear factor  $\kappa$ B-inducing kinase activation as a mechanism of pancreatic  $\beta$  cell failure in obesity. *J. Exp. Med.* *212*, 1239–1254.
4. Sun, S.C. (2011). Non-canonical NF- $\kappa$ B signaling pathway. *Cell Res.* *21*, 71–85.
5. Ren, X., Li, X., Jia, L., Chen, D., Hou, H., Rui, L., Zhao, Y., and Chen, Z. (2017). A small-molecule inhibitor of NF- $\kappa$ B-inducing kinase (NIK) protects liver from toxin-induced inflammation, oxidative stress, and injury. *FASEB J.* *31*, 711–718.
6. Sheng, L., Zhou, Y., Chen, Z., Ren, D., Cho, K.W., Jiang, L., Shen, H., Sasaki, Y., and Rui, L. (2012). NF- $\kappa$ B-inducing kinase (NIK) promotes hyperglycemia and glucose intolerance in obesity by augmenting glucagon action. *Nat. Med.* *18*, 943–949.
7. Cildir, G., Low, K.C., and Tergaonkar, V. (2016). Noncanonical NF- $\kappa$ B Signaling in Health and Disease. *Trends Mol. Med.* *22*, 414–429.
8. Xiao, G., Fong, A., and Sun, S.-C. (2004). Induction of p100 processing by NF- $\kappa$ B-inducing kinase involves docking I $\kappa$ B kinase  $\alpha$  (IKK $\alpha$ ) to p100 and IKK $\alpha$ -mediated phosphorylation. *J. Biol. Chem.* *279*, 30099–30105.
9. Sun, S.-C. (2017). The non-canonical NF- $\kappa$ B pathway in immunity and inflammation. *Nat. Rev. Immunol.* *17*, 545–558.
10. Evangelou, M., Smyth, D.J., Fortune, M.D., Burren, O.S., Walker, N.M., Guo, H., Onengut-Gumuscu, S., Chen, W.M., Concannon, P., Rich, S.S., et al. (2014). A method for gene-based pathway analysis using genomewide association study summary statistics reveals nine new type 1 diabetes associations. *Genet. Epidemiol.* *38*, 661–670.
11. Li, X., Jia, L., Chen, X., Dong, Y., Ren, X., Dong, Y., Chen, Y., Xie, L., Liu, M., Shiota, C., et al. (2018). Islet  $\alpha$ -cell Inflammation Induced By NF- $\kappa$ B inducing kinase (NIK) Leads to Hypoglycemia, Pancreatitis, Growth Retardation, and Postnatal Death in Mice. *Theranostics* *8*, 5960–5971.
12. Halvorsen, B., Santilli, F., Scholz, H., Sahraoui, A., Gulseth, H.L., Wium, C., Lattanzio, S., Formoso, G., Di Fulvio, P., Otterdal, K., et al. (2016). LIGHT/TNFSF14 is increased in patients with type 2 diabetes mellitus and promotes islet cell dysfunction and endothelial cell inflammation in vitro. *Diabetologia* *59*, 2134–2144.
13. Atkinson, M.A., Eisenbarth, G.S., and Michels, A.W. (2014). Type 1 diabetes. *Lancet* *383*, 69–82.
14. Li, Z., Li, X., Su, M.B., Gao, L.X., Zhou, Y.B., Yuan, B., Lyu, X., Yan, Z., Hu, C., Zhang, H., et al. (2020). Discovery of a Potent and Selective NF- $\kappa$ B-Inducing Kinase (NIK) Inhibitor That Has Anti-inflammatory Effects in Vitro and in Vivo. *J. Med. Chem.* *63*, 4388–4407.
15. Cryer, P.E. (2012). Minireview: Glucagon in the pathogenesis of hypoglycemia and hyperglycemia in diabetes. *Endocrinology* *153*, 1039–1048.
16. Willcox, A., Richardson, S.J., Bone, A.J., Foulis, A.K., and Morgan, N.G. (2010). Evidence of increased islet cell proliferation in patients with recent-onset type 1 diabetes. *Diabetologia* *53*, 2020–2028.
17. Feng, A.L., Xiang, Y.-Y., Gui, L., Kaltsidis, G., Feng, Q., and Lu, W.-Y. (2017). Paracrine GABA and insulin regulate pancreatic alpha cell proliferation in a mouse model of type 1 diabetes. *Diabetologia* *60*, 1033–1042.
18. Willcox, A., Richardson, S.J., Bone, A.J., Foulis, A.K., and Morgan, N.G. (2009). Analysis of islet inflammation in human type 1 diabetes. *Clin. Exp. Immunol.* *155*, 173–181.
19. Herrera, P.L. (2000). Adult insulin- and glucagon-producing cells differentiate from two independent cell lineages. *Development* *127*, 2317–2322.
20. Chen, Z., Morris, D.L., Jiang, L., Liu, Y., and Rui, L. (2014). SH2B1 in  $\beta$ -cells regulates glucose metabolism by promoting  $\beta$ -cell survival and islet expansion. *Diabetes* *63*, 585–595.
21. Wang, Y., Gao, M., Zhu, F., Li, X., Yang, Y., Yan, Q., Jia, L., Xie, L., and Chen, Z. (2020). METTL3 is essential for postnatal development of brown adipose tissue and energy expenditure in mice. *Nat. Commun.* *11*, 1648.
22. Jia, L., Jiang, Y., Li, X., and Chen, Z. (2020). Pur $\beta$  promotes hepatic glucose production by increasing Adcy6 transcription. *Mol. Metab.* *31*, 85–97.



YMTHE, Volume 28

## **Supplemental Information**

### **Activation of NF- $\kappa$ B-Inducing Kinase in Islet $\beta$ Cells Causes $\beta$ Cell Failure and Diabetes**

**Xinzhi Li, Yongsen Wu, Yue Song, Na Ding, Min Lu, Linna Jia, Yujun Zhao, Ming Liu, and Zheng Chen**

## Supplemental Information

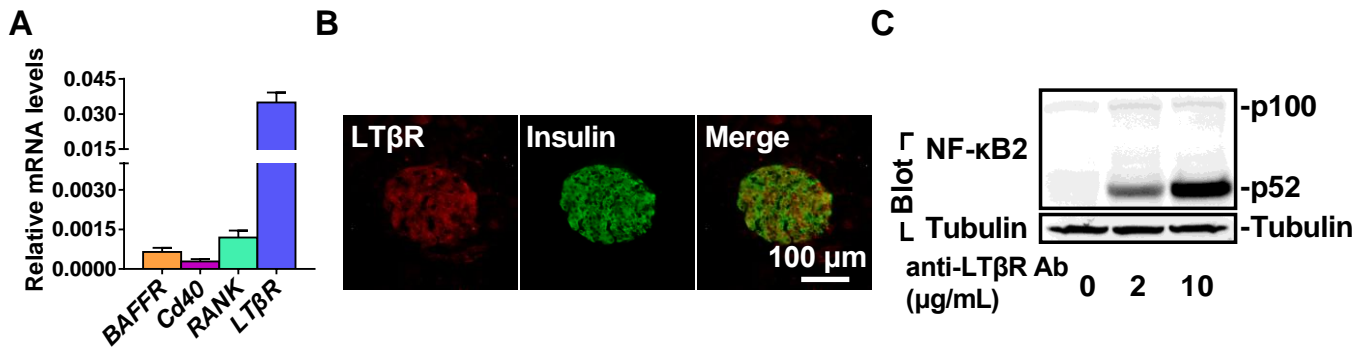

**Figure S1. LTβR/noncanonical NF-κB2 signaling pathway is present in islet β cells.**

(A) The relative expression of *BAFFR*, *Cd40*, *RANK*, and *LTβR* were measured by qPCR in MIN6 cells (n=5 for each group).

(B) Immunostaining of LTβR and insulin in the section of pancreas. The scale bar represents 100 μm.

(C) INS-1 832/13 cells were treated with anti-LTβR antibody at different concentrations (0, 2, 10 μg/ml) for 2 h, and p52 protein levels were measured by immunoblotting. Data represent the mean ± SEM.

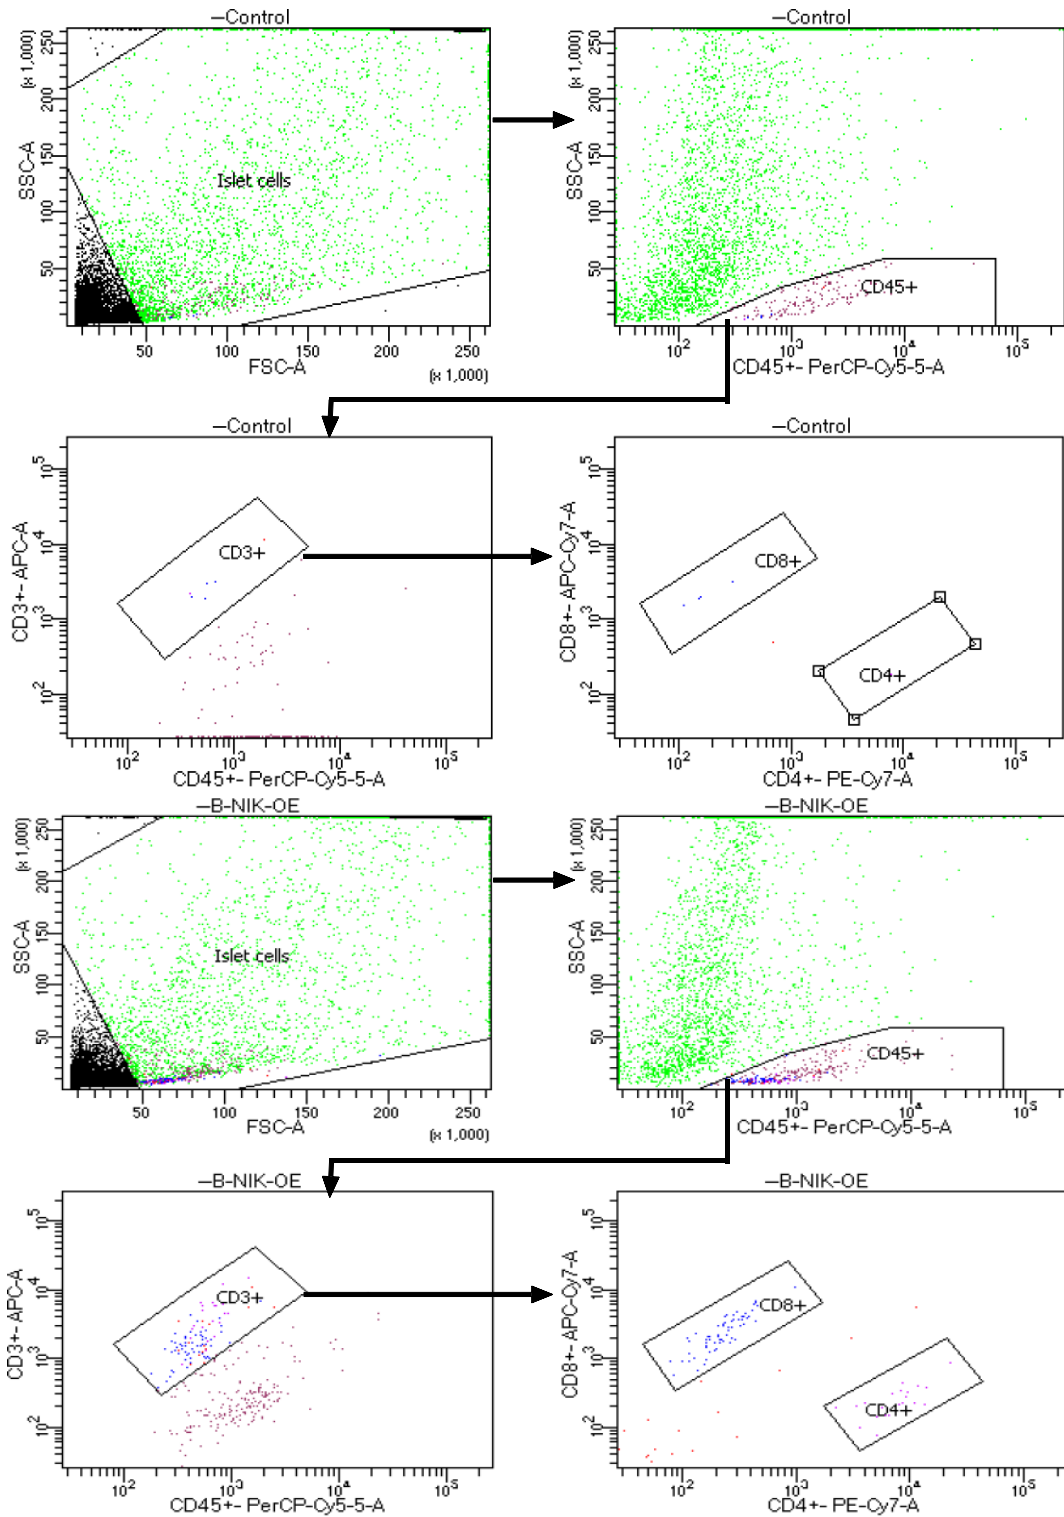

**Figure S2.  $\beta$ -NIK-OE mice display lymphocyte infiltration in islets.**

Islets were isolated from  $\beta$ -NIK-OE mice and control mice at 6 weeks of age. Single cells were dispersed and subjected to FACS analysis. Representative FACS plots of staining for total T (CD45.2<sup>+</sup>CD3<sup>+</sup>) cells, CD4 T (CD45.2<sup>+</sup>CD3<sup>+</sup>CD4<sup>+</sup>) cells, and CD8 T (CD45.2<sup>+</sup>CD3<sup>+</sup>CD8<sup>+</sup>) cells were presented.

**A**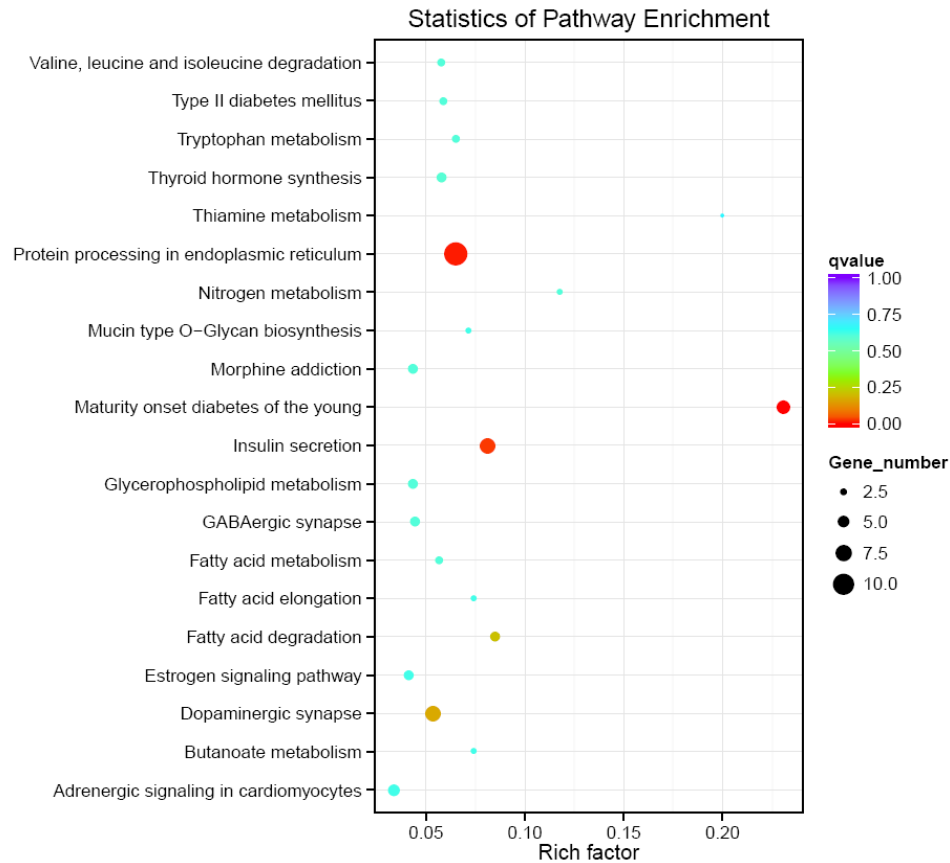**B**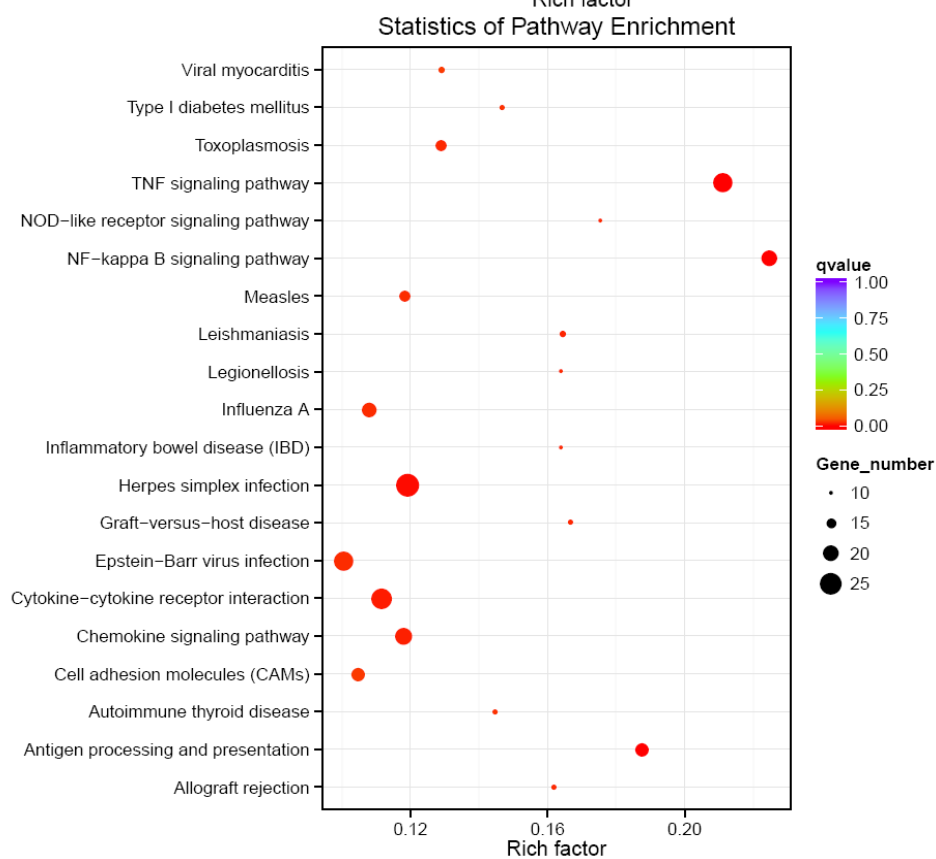

**Figure S3. NIK overexpression decreases signaling pathways associated with insulin secretion while activating immune signaling pathways in INS-1 832/13 cells.**



(A) KEGG pathway enrichment analysis of downregulated genes in NIK-overexpressing INS-1 832/13 cells compared with  $\beta$ Gal control showed that signaling pathways associated with insulin secretion, protein processing in endoplasmic reticulum, and maturity onset diabetes of the young were significantly decreased.

(B) KEGG pathway enrichment analysis of upregulated genes in NIK-overexpressing INS-1 832/13 cells showed that signaling pathways related to immune response were significantly increased.

**Table S1 List of reagents.**

| REAGENT or RESOURCE                             | SOURCE                                      | IDENTIFIER         |
|-------------------------------------------------|---------------------------------------------|--------------------|
| <b>Antibodies</b>                               |                                             |                    |
| $\beta$ -actin                                  | proteintech                                 | Cat#60008-1-Ig     |
| Insulin                                         | Dako                                        | Cat#A0564          |
| Glucagon                                        | Sigma                                       | Cat#G2654          |
| $\alpha$ Tubulin Antibody (B-7)                 | Santa cruz                                  | Cat#sc-5286        |
| NF- $\kappa$ B2                                 | CST                                         | Cat #4882          |
| Flag                                            | SIGMA                                       | Cat# F1804         |
| I $\kappa$ B $\alpha$                           | proteintech                                 | Cat# 10268-1-AP    |
| CD4 Monoclonal Antibody (GK1.5),<br>PE-Cyanine7 | eBioscience™                                | Cat#25-0041-82     |
| APC/Cy7 anti-mouse CD8b Antibody                | BioLegend                                   | Cat#126620         |
| PE anti-mouse F4/80 Antibody                    | BioLegend                                   | Cat#123110         |
| PerCP anti-mouse CD45.2 Antibody                | BioLegend                                   | Cat#109826         |
| APC anti-mouse CD3 Antibody                     | BioLegend                                   | Cat#100236         |
| PE/Cy7 anti-mouse/human CD45R/B220<br>Antibody  | BioLegend                                   | Cat#103222         |
| <b>Chemicals</b>                                |                                             |                    |
| RIPA Buffer                                     | Solarbio                                    | Cat#R0020          |
| MTT                                             | Sigma                                       | Cat#M2128          |
| DMEM                                            | Gibco                                       | Cat#12100046       |
| Blue Plus II Protein Marker                     | Transgen Biotech                            | Cat#L50824         |
| High Pure dNTPs                                 | Transgen Biotech                            | Cat#20201025       |
| GoTaq Green Master Mix                          | Promega                                     | Cat#M7122          |
| M-MLV reverse transcriptase                     | Promega                                     | Cat#M1701          |
| Random Primers                                  | Promega                                     | Cat#C1181          |
| FBS                                             | Gibco                                       | Cat#16000-044      |
| SYBR™ Green Mix                                 | Roche                                       | Cat#4913914001     |
| TriPure Isolation Reagent                       | Roche                                       | Cat#94015120       |
| Blood glucose meter                             | Johnson & Johnson                           | ONETOUCH UltraEasy |
| <b>Assay Kit</b>                                |                                             |                    |
| Ultrasensitive Mouse Insulin<br>immunoassay kit | EZassay                                     | Cat#MS100          |
| $\beta$ - Hydroxybutyrate Assay Kit             | NanjingJianchengBioengineering<br>institute | Cat#E030-1-1       |
| Mouse C-Peptide ELISA Kit                       | ALPCO                                       | Cat#80-CPTMS-E01   |
| TUNEL assay kit                                 | Roche Applied Science                       | Cat#11684795910    |
| TUNEL Dilution Buffer                           | Roche Applied Science                       | Cat#11966006001    |
| Glucagon ELISA Kit                              | R&D Systems                                 | Cat#DGCG0          |
| <b>Software</b>                                 |                                             |                    |
| Graphpad                                        | Graphpadsoftwave                            | Graphpad.com       |

**Table S2 Primers for qPCR**

| Genes             | Forward                         | Reverse                         |
|-------------------|---------------------------------|---------------------------------|
| <i>NIK</i>        | 5'-CATCTTCTCAAATTCGAGTGACAA-3'  | 5'-TGGGAGTAGACAAGGTACAACCC-3'   |
| <i>Insulin1/2</i> | 5-GTCATTGTTTCAACATGGCCCTGT-3'   | 5-TGCAGTAGTTCTCCAGCTGGTA-3'     |
| <i>Glut2</i>      | 5'-CGGAACCTTGGCTTTCAGTGTCTT-3'  | 5'-GGTGCATTGATCACACCGATGTCA-3'  |
| <i>Gck</i>        | 5'-AAGCCGCAGTGAGGACGTGATG-3'    | 5'-AGGTGATTTTCGCAGTTGGGTGTCA-3' |
| <i>Pdx1</i>       | 5'-CCTTTCCCGTGGATGAAAT-3'       | 5'-TGTAGGCAGTACGGGTCCTC-3'      |
| <i>Hnf1a</i>      | 5'-GGAAGACTTCGCGCCACCCATTCT-3'  | 5'-AGTGACTCCACCACGGCTTTCTGG-3'  |
| <i>Hnf1b</i>      | 5'-CGGATCTCGACACCAAGCCGGTTT-3'  | 5'-TGTCATAGTCGTCGCCGTCCTCTG-3'  |
| <i>Hnf4a</i>      | 5'-GCCCTCTCACCTCAGCAATGGACA-3'  | 5'-TGACGATGGTGGTGTATGGCTCCTG-3' |
| <i>Neurod1</i>    | 5'-TGTCCTCGAGGCTCCAGGGTTATGA-3' | 5'-GCCCCGCTCTCGCTGTATGATTTGG-3' |
| <i>Ccl2</i>       | 5'-ACTGAAGCCAGCTCTCTCTCCTC-3'   | 5'-TTCCTTCTTGGGGTCAGCACAGAC-3'  |
| <i>Ccl5</i>       | 5'-CCACTTCTTCTCTGGGTTGG-3'      | 5'-GTGCCACGTCAAGGAGTAT-3'       |
| <i>Ccl11</i>      | 5'-GATCTGTGCTGACCCCAAGAA-3'     | 5'-CTTAGGCTCTGGGTTAGTGTCA-3'    |
| <i>Cxcl1</i>      | 5'-GGCGCCTATCGCCAATGA-3'        | 5'-GACTTCGGTTTGGGTGCAGT-3'      |
| <i>Cxcl10</i>     | 5'-CCAAGTGCTGCCGTCATTTT-3'      | 5'-CTCAACACGTGGGCAGGATA-3'      |
| <i>Cxcl11</i>     | 5'-ATTTACCCGAGTAACGGCTG-3'      | 5'-GAGGCGAGCTTGCTTGGAT-3'       |
| <i>Il1</i>        | 5'-GCCTTGGGCCTCAAAGGAAAGAATC-3' | 5'-GGAAGACACAGATTCCATGGTGAAG-3' |
| <i>Il6</i>        | 5'-AGCCAGAGTCCTTCAGA-3'         | 5'-GGTCCTTAGCCACTCCT-3'         |
| <i>Tnfa</i>       | 5'-CATCTTCTCAAATTCGAGTGACAA-3'  | 5'-TGGGAGTAGACAAGGTACAACCC-3'   |
| <i>Cd3e</i>       | 5'-AGGTGGACCTGACAGCAGTA-3'      | 5'-GGCTCATAGTCTGGGTTGGG-3'      |
| <i>Cd19</i>       | 5'-AGGCAATGTTGTGCTGCCA-3'       | 5'-AATCACTAGCAAGATGCCCAGG-3'    |
| <i>Cd74</i>       | 5'-CAAGTGCGACGAGAACGGTA-3'      | 5'-CAGGGTGACTTGACCCAGTTC-3'     |
| <i>RT1-Ba</i>     | 5'-CAAGACGACATTGAGGCCGA-3'      | 5'-CAGTTGTCCAAACTCGGGGA-3'      |
| <i>RT1-CE4</i>    | 5'-TTGGAGCTGTGGCCATGATT-3'      | 5'-TCACAATCTGCGAGGGACAC-3'      |
| <i>RT1-CE7</i>    | 5'-GAACCTTCCAGAAGTGGGCA-3'      | 5'-CACAGCAGAGATGGCTCCAA-3'      |
| <i>RT1-Da</i>     | 5'-TGAGGTGGATCACTGGGGTC-3'      | 5'-CACTGCGTTGCGTTTCCG-3'        |
| <i>RT1-M2</i>     | 5'-CTGCTGAGCGCTTCTTTGG-3'       | 5'-AACCTCGGATTCAGTGCCTC-3'      |
| <i>RT1-M3</i>     | 5'-TCGTCTCAGTCCTTTGTGTCGTC-3'   | 5'-AACAGACTCAGTCCCACACAC-3'     |
| <i>B2M</i>        | 5'-GGGAAGCCCAACTTCCTCAA-3'      | 5'-ATACATCGGTCTCGGTGGGT-3'      |
| <i>BAFFR</i>      | 5'-CCAGCAAGAGTCCCTGGAAAAT-3'    | 5'-CTCCACTGCTGCTATTGCTCT-3'     |
| <i>Cd40</i>       | 5'-TTGTTGACAGCGGTCCATCT-3'      | 5'-GCGAATCTCCCTGTTCCACT-3'      |
| <i>RANK</i>       | 5'-CCTTCGACTGGTTCAGTGTCT-3'     | 5'-GGACACGGGCATAGAGTCAG-3'      |
| <i>LTβR</i>       | 5'-CAGCTGGTGCCCCCTTATC-3'       | 5'-AAGACAAACTCGCCTGGGG-3'       |
